# Supplementary material for: Serendipity strikes again—efficient preparation of lithium tetramethylcuprate(iii) via rapid injection NMR
Source: Royal Society of Chemistry journal article supplement (doi:10.1039/b924000d), 2010-01-01

# Serendipity Strikes Again—Efficient Preparation of Lithium Tetramethylcuprate(III) via Rapid Injection NMR.

Erika R. Bartholomew,<sup>a</sup> Steven H. Bertz,<sup>b,\*</sup> Stephen K. Cope,<sup>a</sup> Michael D. Murphy,<sup>a</sup> Craig A. Ogle<sup>a,\*</sup> and Andy A. Thomas<sup>a</sup>

## Supplementary Information

Fig. S1. Stejskal-Tanner plots and diffusion coefficients for lithium tetramethylcuprate(III) **1** and two internal standards in THF-*d*<sub>8</sub> at -100 °C. The double stimulated echo pulse sequence with bipolar gradient pulses and longitudinal eddy current delay (Jerschow and Müller, *J. Magn. Reson.* 1996, **125**, 372) was used with diffusion time 500 ms, gradient duration 2.5 ms, gradient recovery time 0.1 ms, and eddy current delay 50 ms. The internal standards were used to obtain the relationship,  $\ln D = -0.769 \ln M - 19.802$  from which a mass of 287 amu is calculated for **1**.

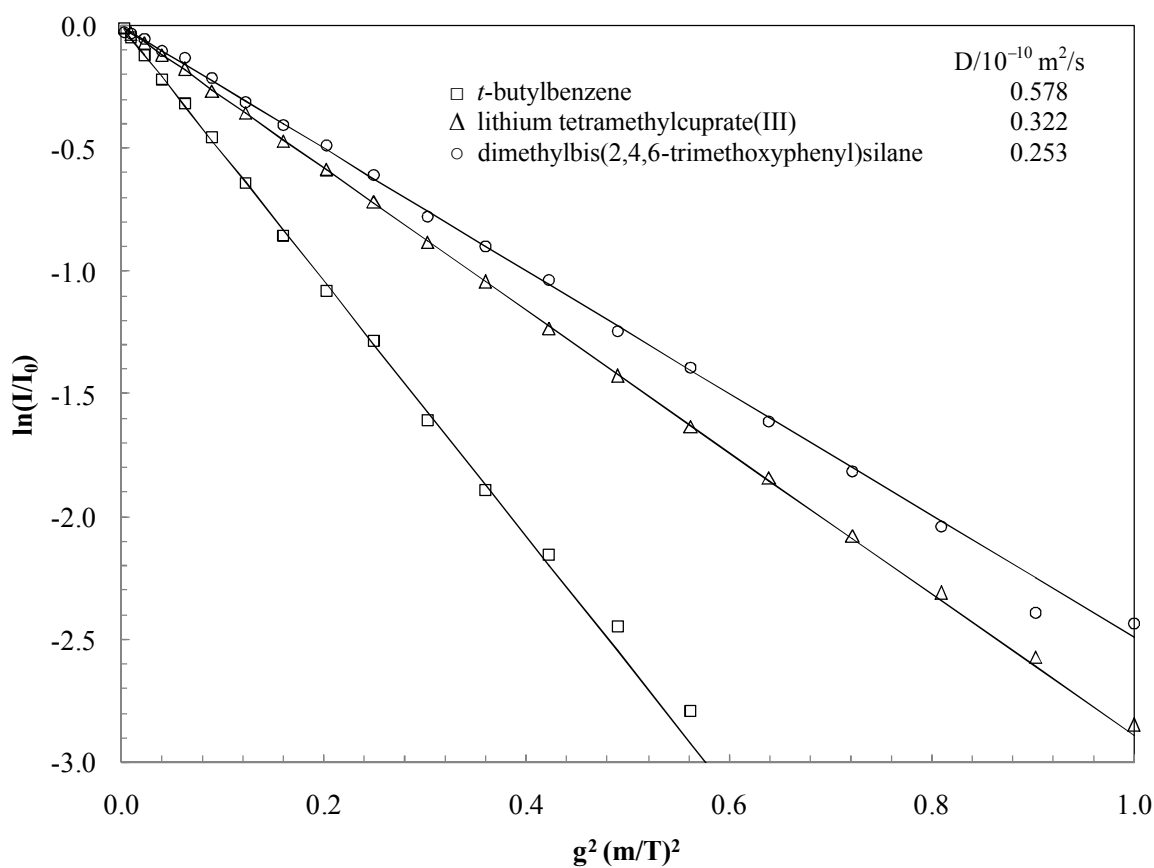

Supplement: b924000d.pdf [file b924000d.pdf]
